# Supplementary material for: Pharmacological inhibition of sphingolipid synthesis reduces ferroptosis by stimulating the HIF-1 pathway
Source: PubMed Central journal article supplement (PMC9240796; doi:10.1016/j.isci.2022.104533), 2022-06-06
Supplement: mmc1.pdf [file mmc1.pdf]

**iScience, Volume 25**

**Supplemental information**

**Pharmacological inhibition of sphingolipid  
synthesis reduces ferroptosis  
by stimulating the HIF-1 pathway**

**Yang Liu, Libo He, Binghua Liu, Yuling Ying, Junling Xu, Meng Yu, Jinye Dang, and Ke Liu**

## Supplemental Figures

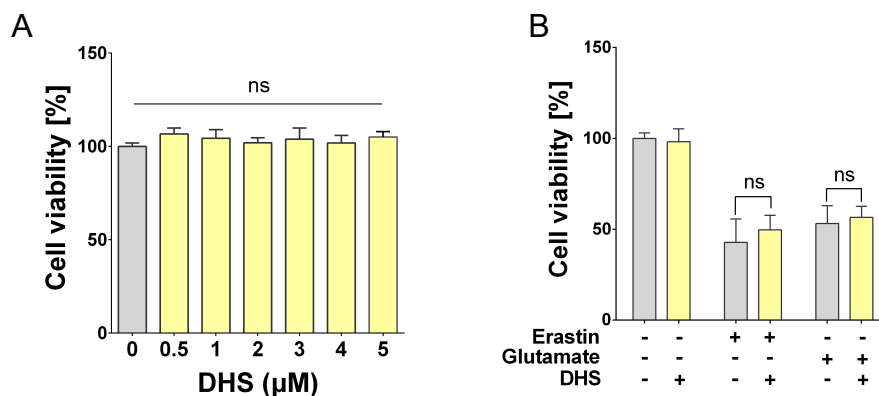

**Figure S1**

DHS alone has no impact on cell viability (Related to Figure 1). **A** Cell viability analysis of cells treated with DHS for 36h. **B** Cell viability analysis of cells pre-treated with DHS (1 μM) for 36h before incubating with erastin (1 μM) or glutamate (15 mM) for 24h. Error bars represent the mean ± SD (n = 3, ns, no significant).

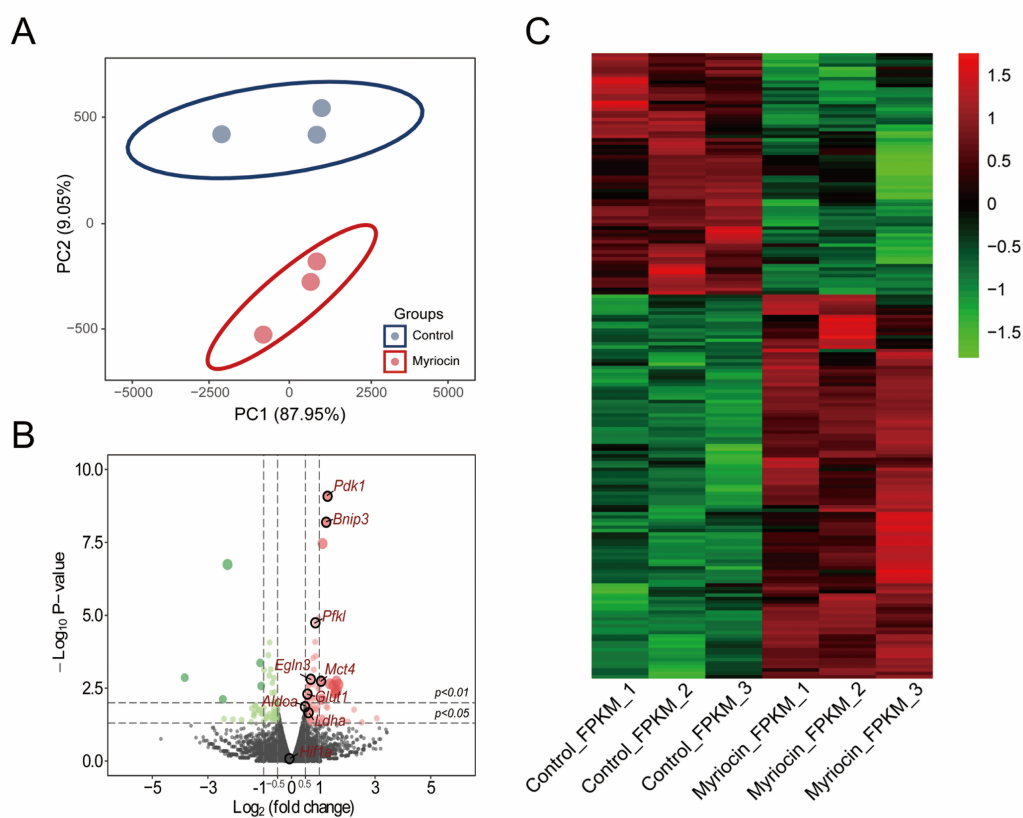

**Figure S2**

RNA sequencing analysis of HT22 cells treated with or without myriocin (0.5 μM) for 36 h (Related to Figure 3). **A** Principal component analysis (PCA) score plot of gene expression profiles. **B** Volcano plots of gene expression profiles. The black circle presents the genes verified in Figure 4A. **C** Heatmap of expression (Log2FC) of all differentially expressed genes ( $p\text{-value} < 0.05$ ).

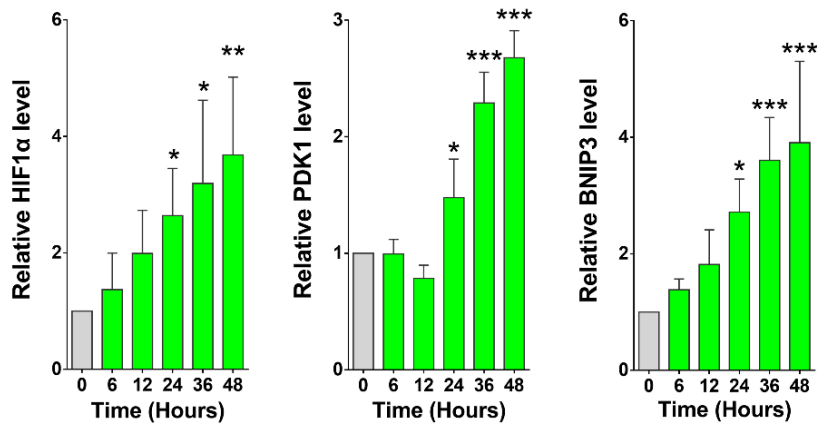

**Figure S3**

Myriocin increases protein levels of HIF1 $\alpha$ , PDK1 and BNIP3 (Related to Figure 4). Western blots in Figure 4C were quantified using ImageJ software. Data were normalized to relevant untreated control. Error bars represent the mean  $\pm$  SD (n = 3, \*  $p < 0.05$ , \*\*  $p < 0.01$ , \*\*\*  $p < 0.001$ , ns, no significant).

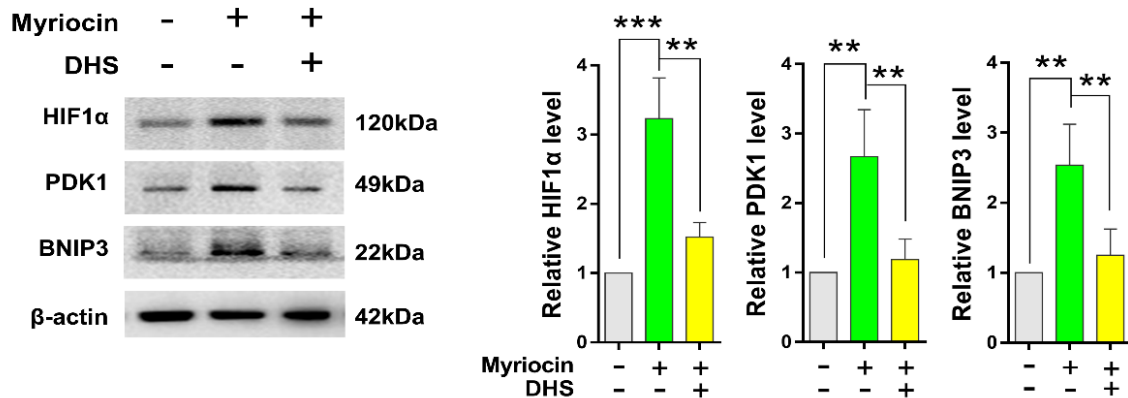

**Figure S4**

Western blotting analysis of HIF1 $\alpha$ , PDK1 and BNIP3 protein in HT22 cells treated with or without myriocin (0.5  $\mu$ M) in the presence or absence of DHS (1  $\mu$ M) (Related to Figure 4). Bar graph shows the quantification of protein expression relative to the relevant untreated control. Error bars represent the mean  $\pm$  SD (n = 3, \*  $p < 0.05$ , \*\*  $p < 0.01$ , \*\*\*  $p < 0.001$ ).

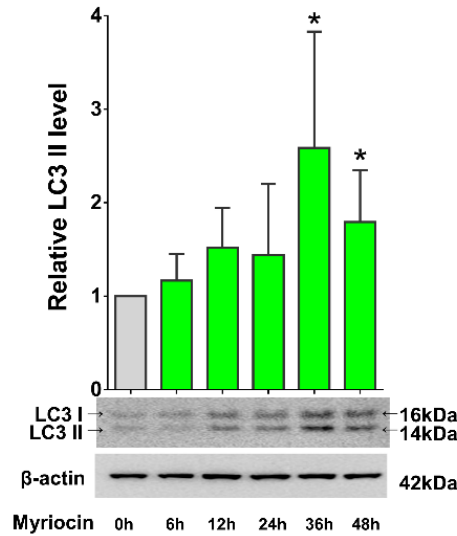

**Figure S5**

Myriocin increases LC3II in a time dependent manner (Related to Figure 4). HT22 cells were treated with myriocin (0.5  $\mu$ M) for different time and subjected to Western blotting for LC3II. Bar graph shows the quantification of protein expression relative to the relevant untreated control. Error bars represent the mean  $\pm$  SD (n = 3, \*  $p$  < 0.05).

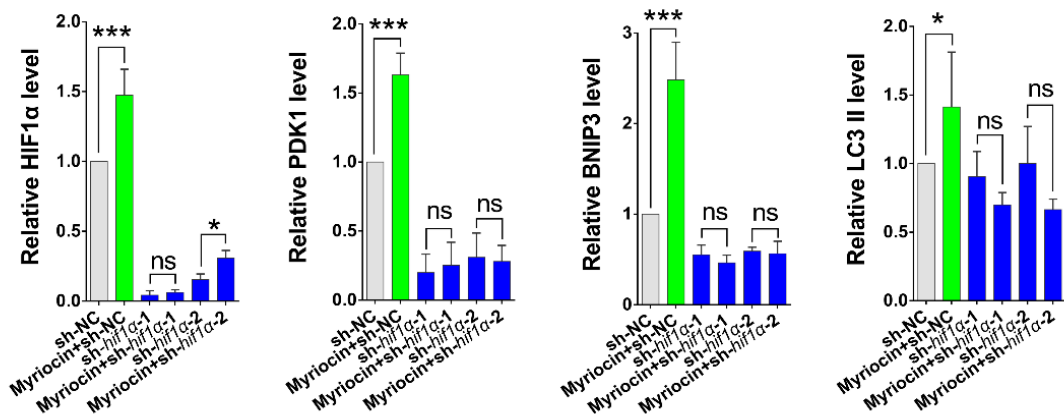

**Figure S6**

*Hif1α* knockdown decreases HIF1 $\alpha$ , PDK1, BNIP3 and LC3 II (Related to Figure 5). Western blots in Figure 5B were quantified using ImageJ software. Data were normalized to relevant untreated control. Error bars represent the mean  $\pm$  SD (n = 3, \*  $p$  < 0.05, \*\*  $p$  < 0.01, \*\*\*  $p$  < 0.001, ns, no significant).

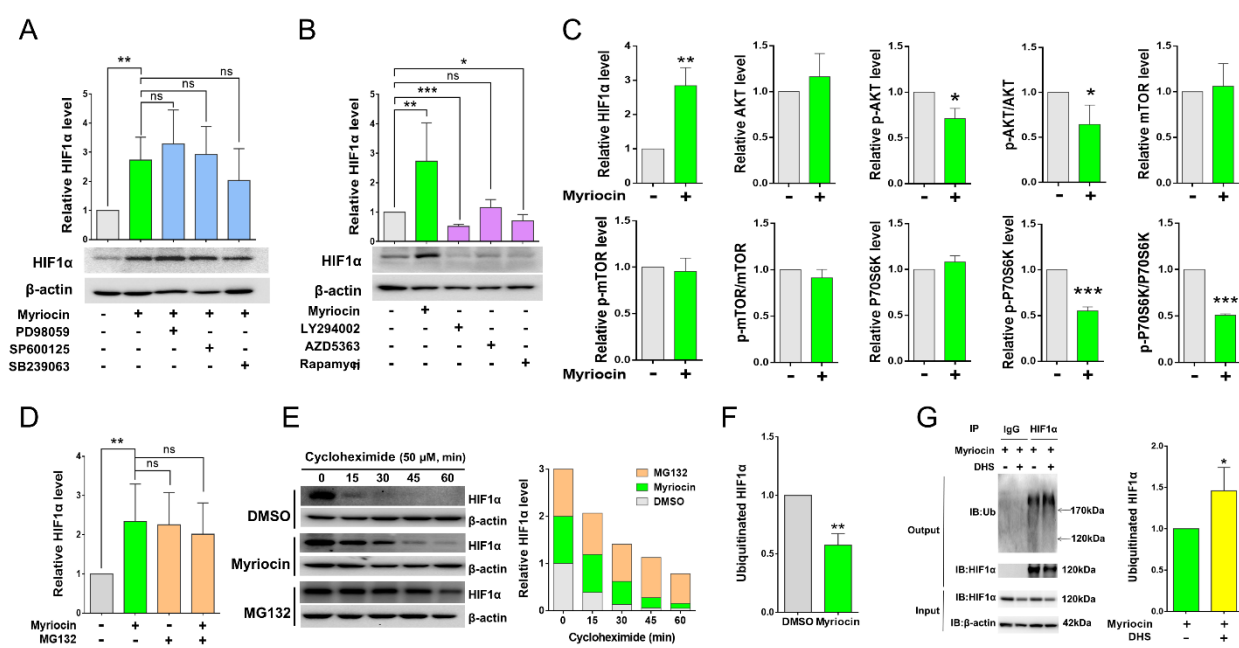

**Figure S7**

Myriocin activates the HIF-1 pathway independent of MAPK or PI3K pathways (Related to Figure 6). **A** Western blotting analysis of HIF1 $\alpha$  protein in HT22 cells treated with myriocin (0.5  $\mu$ M) in the presence or absence of PD98059 (10  $\mu$ M), SP600125 (10  $\mu$ M) or SB239063 (10  $\mu$ M) for 36h. **B** Western blotting analysis of HIF1 $\alpha$  protein in HT22 cells treated with myriocin (0.5  $\mu$ M), LY294002 (10  $\mu$ M), AZD5363 (5  $\mu$ M) or Rapamycin (1  $\mu$ M) for 36h. **C** The quantification of western blots in Figure 6C. **D** The quantification of western blots in Figure 6D. **E** Western blotting analysis of HIF1 $\alpha$  protein in HT22 cells treated with myriocin (0.5  $\mu$ M, 36h) or MG132 (10  $\mu$ M, 4h) before incubating with 50 $\mu$ M cycloheximide for indicated time. **F** The quantification of western blots in Figure 6E. **G** Ubiquitin/HIF1 $\alpha$  co-immunoprecipitation in HT22 cell extracts. Cells treated with myriocin (0.5  $\mu$ M) in the presence or absence of DHS (1  $\mu$ M) for 36h were lysed and immunoprecipitated with anti-HIF1 $\alpha$  antibody or normal immunoglobulin G (IgG) as negative control. The immunocomplexes were then immunoblotted using anti-ubiquitin or anti-HIF1 $\alpha$  antibody (Output). The levels of HIF1 $\alpha$  in cell lysates before immunoprecipitation were also monitored (Input). Bar graph shows the quantification of protein expression relative to the relevant untreated control. Error bars represent the mean  $\pm$  SD (n = 3, \*  $p$  < 0.05, \*\*  $p$  < 0.01, \*\*\*  $p$  < 0.001, ns, no significant).

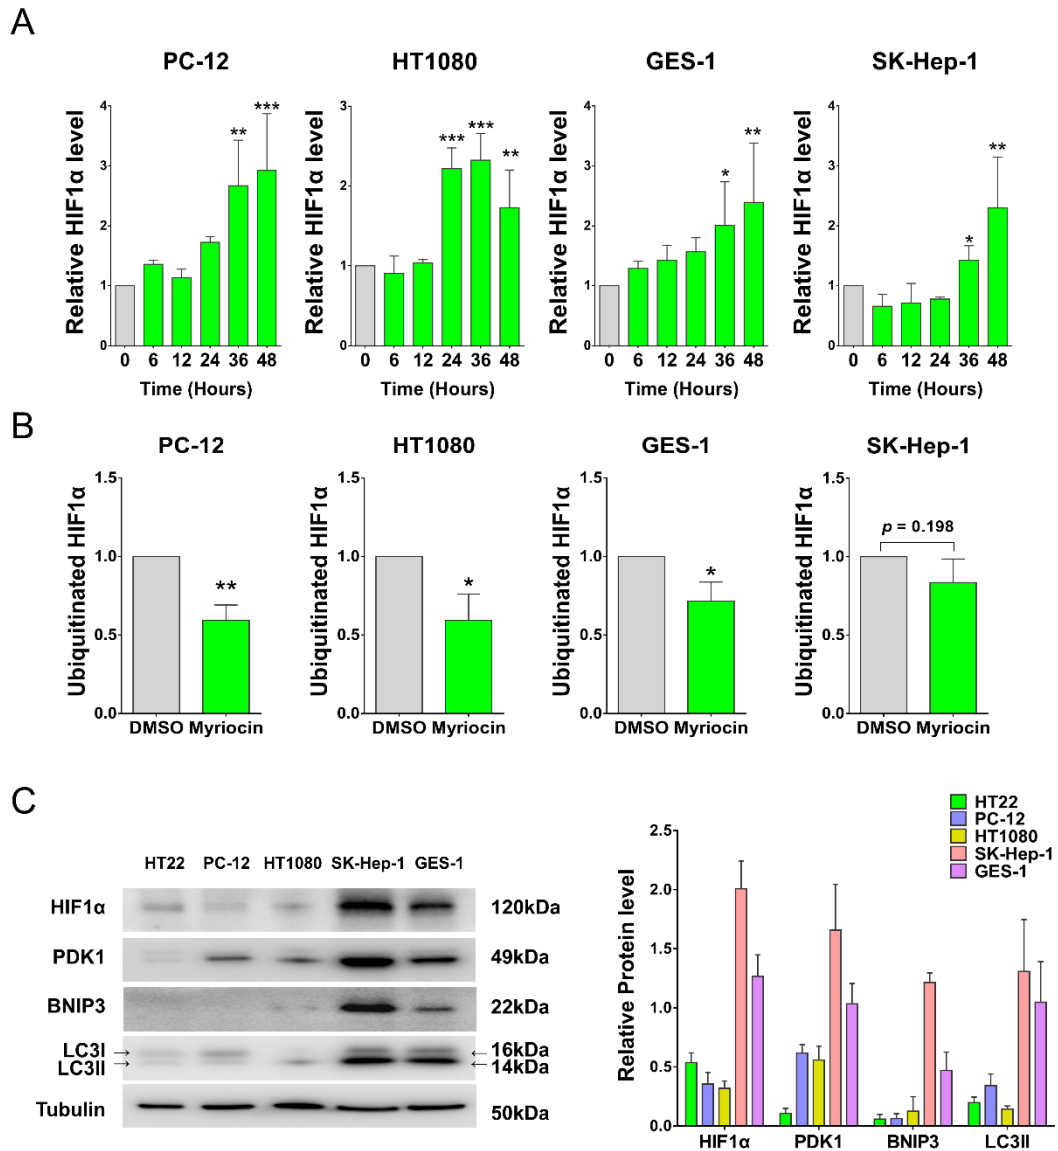

**Figure S8**

Myriocin stabilizes HIF1 $\alpha$  in different cell lines (Related to Figure 7). **A** The quantification of western blots in Figure 7A. **B** The quantification of western blots in Figure 7C. **C** Proteins of interested in HT22, PC-12, HT1080, GES-1 and SK-Hep-1 cells were tested by Western blotting. Bar graph shows the quantification of protein expression relative to the relevant untreated control. Error bars represent the mean  $\pm$  SD (n = 3, \*  $p < 0.05$ , \*\*  $p < 0.01$ , \*\*\*  $p < 0.001$ , ns, no significant).

**Table S2. qPCR primer sequences (Related to STAR Methods)**

| Genes              | Forward primer (5'-3')   | Reverse primer (5'-3')  |
|--------------------|--------------------------|-------------------------|
| <i>Hif1α</i>       | AAGTCAGCAACGTGGAAGGT     | ATCAGCACCAAGCACGTCAT    |
| <i>Pdk1</i>        | ACGGGACAGATGCGGTTATC     | GCGTCCCATGTGCGTTTAAG    |
| <i>Bnip3</i>       | AGGCGTCTGACAACCTCCAC     | CCAAGGACCATGCTAGCTCT    |
| <i>Egln3</i>       | AATGGTGATGGCCGCTGTAT     | GCATAGGAGGGCTGGACTTC    |
| <i>Glut1</i>       | ACCATCTTGGAGCTGTTCCG     | GCCTTCTCGAAGATGCTCGT    |
| <i>Aldoa</i>       | AACATACTCCCTCGGCCCT      | TCAGTAACATACTGGCAGCG    |
| <i>Pfkf1</i>       | TCCGCACCTACAACATCCAC     | GGCTGGGATGACACACATGA    |
| <i>Ldha</i>        | ACTCAAGGGCGAGATGATGG     | CCAGCTTGGAGTTCGCAGTT    |
| <i>Shc4</i>        | GGAAGCAATAAGTCGCCTGTG    | ATCAGTGTGAGGCTGCTTGT    |
| <i>Actb</i>        | TGTACCCAGGCATTGCTGAC     | AACGCAGCTCAGTAACAGTCC   |
| <i>Human-hif1α</i> | CCTATGACCTGCTTGGTGCT     | GTCCTGTGGTGACTTGCCT     |
| <i>Human-Actb</i>  | GCTCACCATGGATGATGATATCGC | TAGGAATCCTTCTGACCCATGCC |
| <i>Rat-hif1α</i>   | AATCTGAGGACACGAGCTGC     | GCTGCCGAAGTCCAGTGATA    |
| <i>Rat-Actb</i>    | CCCGCGAGTACAACCTTCT      | ATACCCACCATCACACCCTG    |
